# Supplementary material for: Retinal alpha-synuclein accumulation correlates with retinal dysfunction and structural thinning in the A53T mouse model of Parkinson’s disease
Source: Front Neurosci. 2023 May 5;17:1146979. doi: 10.3389/fnins.2023.1146979 (PMC10196133; doi:10.3389/fnins.2023.1146979)
Supplement: Supplementary file 1 [file Data_Sheet_1.docx]

Supplementary Material

Retinal Alpha-synuclein Accumulation Parallels Retinal Dysfunction & Structural Thinning in the A53T Mouse Model of Parkinson’s Disease

Katie K.N. Tran1, Vickie H.Y. Wong1, Anh Hoang1, David I. Finkelstein2, Bang V. Bui1, Christine T.O. Nguyen1*

1Ocular Biomarkers Laboratory, Department of Optometry and Vision Sciences, The University of Melbourne, Parkville, Victoria, Australia.

2Parkinson’s Disease Laboratory, The Florey Institute of Neuroscience and Mental Health, The University of Melbourne, Parkville, Victoria, Australia.

*** Correspondence:** Christine T.O. Nguyen: [christine.nguyen@unimelb.edu.au](mailto:christine.nguyen@unimelb.edu.au)

# Supplementary Figures and Tables

## Supplementary Figures


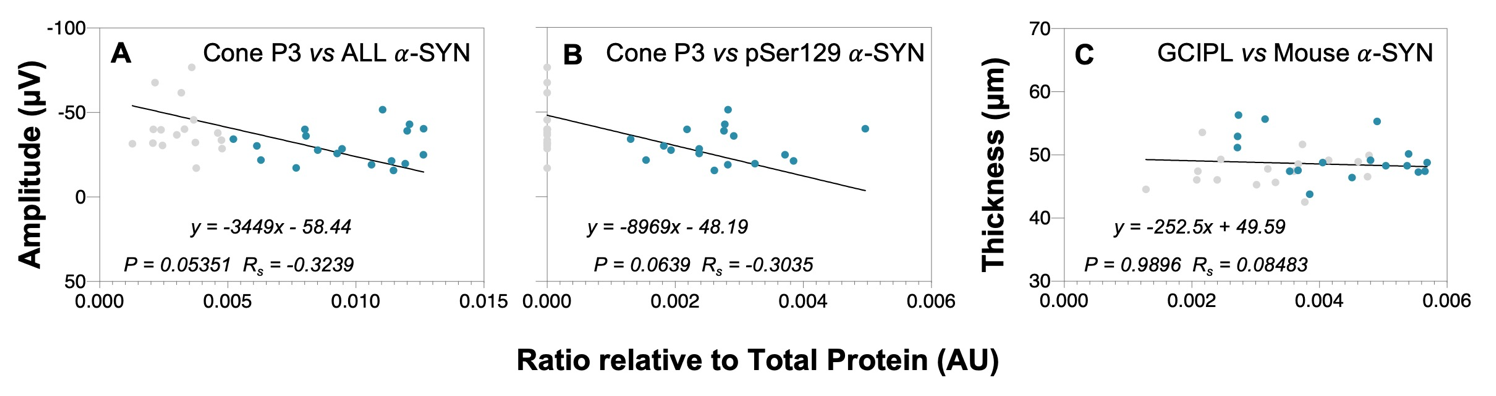


**Supplementary Figure 1.** **Additional correlations between retinal α-SYN, structure and function.** Deming linear regression analysis of total alpha-synuclein (addition of mouse α-SYN, human α-SYN and phosphorylated α-SYN, denoted as ALL) and phosphorylated α-SYN (pSer129 α-SYN) levels with cone P3 amplitude (**A**, **B**) and ganglion cell inner plexiform layer (GCIPL) thickness with mouse α-SYN levels (**C**), respectively. Gray dots denote wildtype (WT; *n* = 18-37) controls and teal dots denote A53T homozygous (HOM; *n* = 18-34) mice. Spearman’s R (Rs) is given.

**
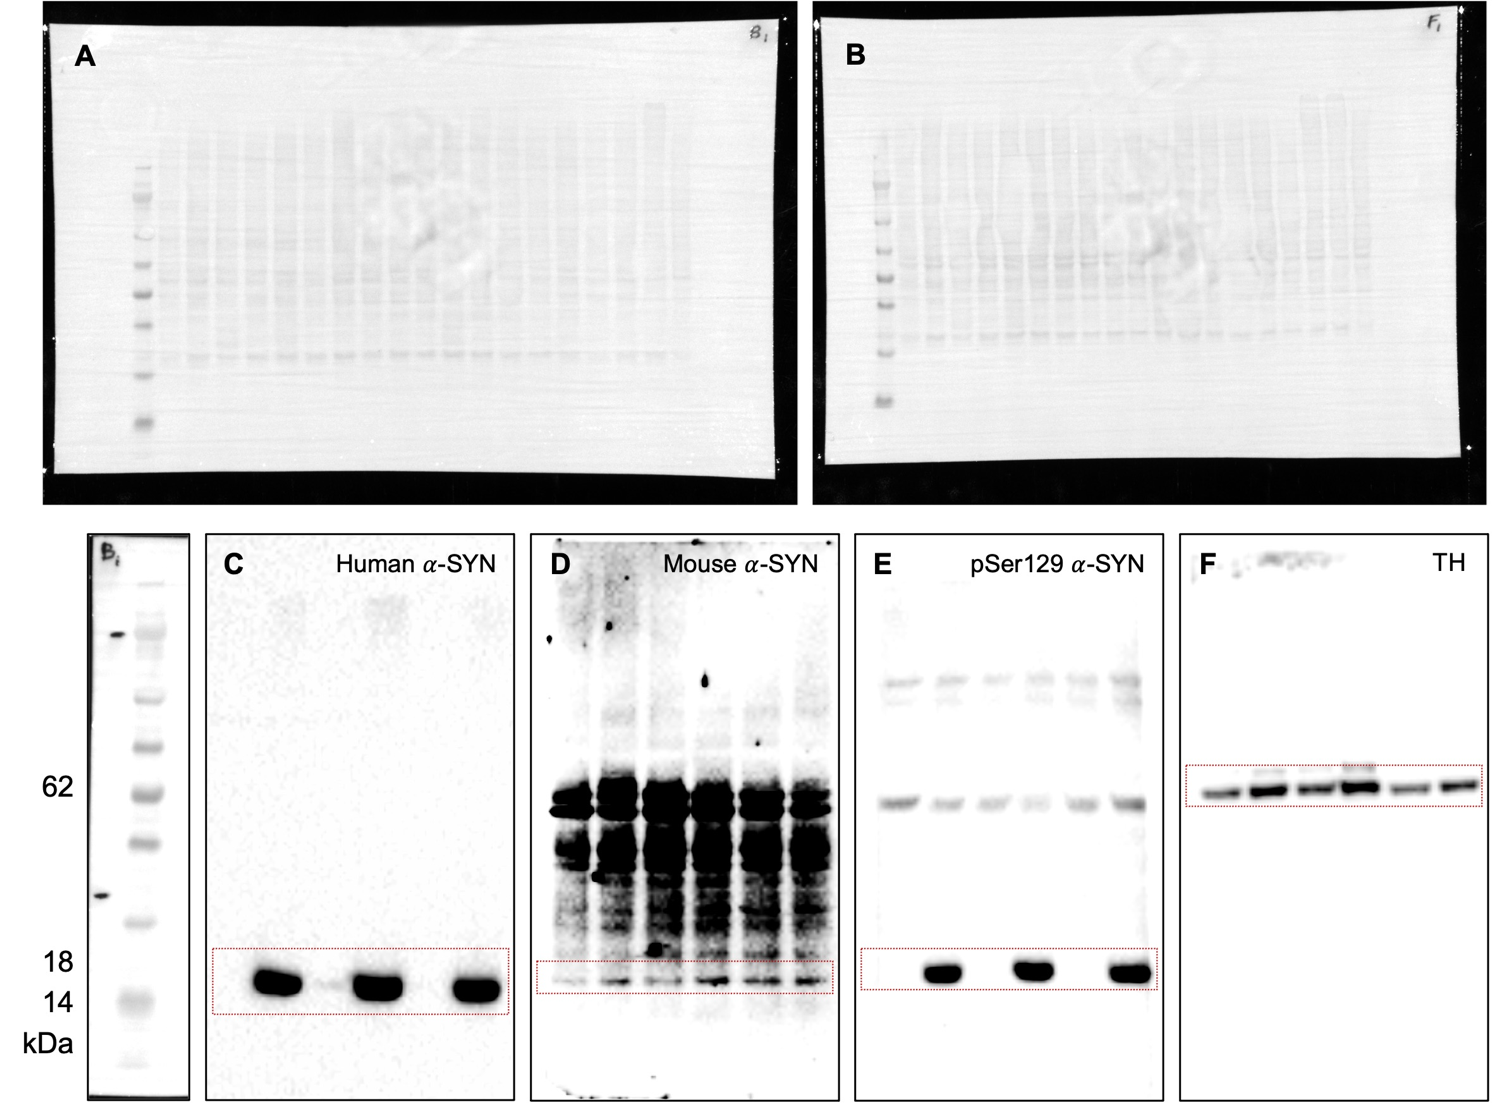
**

**Supplementary Figure 2.** **Western Blots of A53T and WT retinae.** All quantitative Western blot data and analysis was obtained from two individual retinal sample (*n* = 6) blots (**A-B**) which were probed with human α-SYN (**C**), mouse α-SYN (**D**), phosphorylated (pSer129) α-SYN (**E**) and tyrosine hydroxylase (TH, **F**) as indicated by the red dotted rectangle on the provided representative blots (pooled *n* = 6 retinae per lane).
